# Supplementary material
Source: MDPI journal article supplement (https://www.mdpi.com/2077-0472/13/12/2250)
Supplement: s1 [file s1]

**TableS3.** List of primers used for the qRT-PCR assay of the key structural genes involved in Lino  
leic and Linolenic Acid traits.

| Name of Genes             | Primer Sequences        | Use            |
|---------------------------|-------------------------|----------------|
| <i>Glyma.13G035600</i> S  | CCCAACATCTCTCACCATTCTT  | qPCR assay     |
| <i>Glyma.13G035600</i> AS | CCCATCCCTACGCACAATATC   |                |
| <i>Glyma.19G147400</i> S  | GTTCTCCGCTCATTCTCCTATG  | qPCR assay     |
| <i>Glyma.19G147400</i> AS | CTCTCCCAAGATGGGCTTTATT  |                |
| ActinIII S                | GCTGTTCTTTCACTTTATGCAAG | Reference gene |
| ActinIII AS               | CGCTCGGCTGAGGTGGTGAAGGA |                |
