# Supplementary material
Source: MDPI journal article supplement (https://www.mdpi.com/2077-0472/13/12/2250)
Supplement: s1 [file s1]

**Table S4.** Three-year phenotypic data on linoleic and linolenic acids from 292 soybean germplasm resources.

| Line | C18:2_2019 | C18:3_2019 | C18:2_2020 | C18:3_2020 | C18:2_2021 | C18:3_2021 |
|------|------------|------------|------------|------------|------------|------------|
| K001 | 59.68      | 4.68       | 61.02      | 9.71       | 64.69      | 9.75       |
| K002 | 55.40      | 8.72       | 59.39      | 11.76      | 57.62      | 9.20       |
| K003 | 53.64      | 10.64      | 57.16      | 8.92       | 51.89      | 7.35       |
| K004 | 51.09      | 4.61       | 61.00      | 7.50       | 57.79      | 8.69       |
| K005 | 58.36      | 4.90       | 53.29      | 8.42       | 55.51      | 5.27       |
| K006 | 53.36      | 5.87       | 60.11      | 5.18       | 58.14      | 7.12       |
| K007 | 61.27      | 8.60       | 59.11      | 6.60       | 61.87      | 5.68       |
| K008 | 62.60      | 4.63       | 64.30      | 6.70       | 59.19      | 5.36       |
| K009 | 63.08      | 9.22       | 52.52      | 9.31       | 56.05      | 8.53       |
| K010 | 53.58      | 12.68      | 69.61      | 9.47       | 47.48      | 8.32       |
| K011 | 58.46      | 6.46       | 60.87      | 7.64       | 57.17      | 7.42       |
| K012 | 62.03      | 5.00       | 61.10      | 3.60       | 55.92      | 6.91       |
| K013 | 58.21      | 7.00       | 54.78      | 9.45       | 53.19      | 2.79       |
| K014 | 62.40      | 10.78      | 57.28      | 5.95       | 60.96      | 6.79       |
| K015 | 58.12      | 8.11       | 56.97      | 6.55       | 57.21      | 5.67       |
| K016 | 53.96      | 6.84       | 61.73      | 5.57       | 55.89      | 3.67       |
| K017 | 55.48      | 12.54      | 69.43      | 9.11       | 60.86      | 7.21       |
| K018 | 66.85      | 9.44       | 58.56      | 6.48       | 54.09      | 4.91       |
| K019 | 55.20      | 7.04       | 53.12      | 3.28       | 58.83      | 6.06       |
| K020 | 55.47      | 11.30      | 69.24      | 8.76       | 63.57      | 7.23       |
| K021 | 55.12      | 9.77       | 67.04      | 9.40       | 50.30      | 4.16       |
| K022 | 55.59      | 6.38       | 65.10      | 10.01      | 65.75      | 8.83       |
| K023 | 58.95      | 10.51      | 67.30      | 4.08       | 59.83      | 4.90       |
| K024 | 53.96      | 9.81       | 69.56      | 9.42       | 62.42      | 7.41       |
| K025 | 68.64      | 11.73      | 67.63      | 9.35       | 65.94      | 6.85       |
| K026 | 61.25      | 10.19      | 53.64      | 3.30       | 51.61      | 3.10       |
| K027 | 57.39      | 9.22       | 63.09      | 9.37       | 57.31      | 5.82       |
| K028 | 58.97      | 8.46       | 55.59      | 4.54       | 55.94      | 7.08       |
| K029 | 56.80      | 5.47       | 60.89      | 7.12       | 58.14      | 4.77       |
| K030 | 60.82      | 7.31       | 51.98      | 9.03       | 60.58      | 9.09       |
| K031 | 58.39      | 9.35       | 54.72      | 9.66       | 55.10      | 8.95       |
| K032 | 62.82      | 4.28       | 56.82      | 10.62      | 56.29      | 8.78       |
| K033 | 52.24      | 8.70       | 63.44      | 7.17       | 64.36      | 8.83       |
| K034 | 48.55      | 10.23      | 59.86      | 9.75       | 58.07      | 6.83       |
| K035 | 63.22      | 6.93       | 60.04      | 6.64       | 57.30      | 6.97       |

|      |       |       |       |       |       |      |
|------|-------|-------|-------|-------|-------|------|
| K036 | 54.76 | 8.25  | 55.59 | 8.53  | 51.91 | 3.80 |
| K037 | 53.97 | 12.59 | 54.97 | 11.59 | 57.86 | 8.90 |
| K038 | 60.36 | 8.59  | 60.82 | 8.31  | 59.11 | 6.02 |
| K039 | 61.04 | 7.48  | 62.74 | 5.35  | 61.51 | 8.44 |
| K040 | 58.89 | 7.35  | 55.08 | 6.50  | 53.93 | 6.19 |
| K041 | 57.59 | 2.97  | 59.42 | 9.35  | 58.43 | 4.43 |
| K042 | 60.41 | 14.34 | 67.07 | 12.30 | 60.42 | 9.76 |
| K043 | 61.74 | 9.53  | 64.40 | 7.64  | 60.54 | 7.82 |
| K044 | 60.73 | 4.57  | 52.55 | 4.37  | 52.98 | 6.73 |
| K045 | 60.41 | 11.27 | 65.51 | 9.79  | 61.95 | 8.73 |
| K046 | 57.47 | 4.40  | 62.08 | 9.22  | 60.59 | 8.84 |
| K047 | 51.68 | 7.31  | 58.23 | 9.97  | 57.89 | 4.83 |
| K048 | 66.87 | 9.12  | 56.13 | 10.72 | 61.77 | 6.88 |
| K049 | 57.73 | 10.27 | 66.04 | 6.86  | 59.63 | 5.50 |
| K050 | 54.88 | 6.26  | 59.21 | 6.00  | 56.78 | 5.72 |
| K051 | 54.53 | 4.70  | 60.69 | 3.05  | 57.86 | 4.10 |
| K052 | 62.81 | 7.63  | 61.52 | 8.95  | 60.54 | 5.64 |
| K053 | 58.43 | 7.56  | 64.24 | 7.66  | 58.13 | 4.33 |
| K054 | 55.97 | 5.55  | 51.40 | 5.89  | 54.33 | 5.92 |
| K055 | 65.24 | 6.66  | 54.91 | 6.61  | 53.57 | 6.54 |
| K056 | 53.51 | 8.11  | 56.03 | 11.35 | 59.14 | 7.06 |
| K057 | 59.98 | 6.84  | 63.44 | 9.68  | 56.44 | 7.32 |
| K058 | 68.21 | 9.05  | 58.78 | 8.84  | 61.22 | 6.88 |
| K059 | 52.98 | 10.03 | 51.29 | 4.31  | 52.71 | 5.43 |
| K060 | 56.09 | 5.20  | 62.20 | 5.62  | 55.34 | 6.18 |
| K061 | 56.88 | 7.62  | 58.93 | 8.59  | 56.99 | 7.59 |
| K062 | 55.82 | 9.62  | 51.55 | 2.39  | 55.82 | 4.26 |
| K063 | 51.28 | 4.60  | 57.19 | 3.81  | 55.83 | 4.00 |
| K064 | 55.82 | 2.58  | 53.84 | 4.63  | 51.02 | 4.43 |
| K065 | 58.38 | 12.95 | 67.55 | 7.20  | 64.12 | 6.03 |
| K066 | 58.37 | 3.53  | 61.25 | 10.19 | 56.68 | 7.65 |
| K067 | 60.85 | 4.40  | 61.84 | 9.55  | 57.71 | 7.48 |
| K068 | 68.61 | 9.47  | 47.23 | 4.43  | 52.12 | 4.89 |
| K069 | 53.91 | 5.61  | 55.03 | 7.76  | 54.53 | 5.49 |
| K070 | 59.39 | 12.76 | 45.07 | 6.83  | 47.02 | 5.70 |
| K071 | 51.15 | 4.75  | 60.83 | 9.43  | 59.74 | 7.29 |
| K072 | 63.34 | 10.91 | 63.96 | 7.95  | 62.14 | 8.34 |
| K073 | 59.13 | 9.52  | 59.89 | 8.43  | 56.84 | 8.15 |

|      |       |       |       |       |       |      |
|------|-------|-------|-------|-------|-------|------|
| K074 | 58.88 | 13.67 | 66.15 | 5.64  | 59.68 | 6.59 |
| K075 | 63.29 | 5.83  | 55.28 | 8.80  | 59.57 | 7.21 |
| K076 | 64.21 | 8.04  | 55.20 | 8.04  | 56.12 | 7.77 |
| K077 | 69.56 | 10.42 | 52.64 | 11.64 | 51.49 | 7.09 |
| K078 | 52.95 | 6.23  | 70.53 | 6.82  | 64.47 | 7.56 |
| K079 | 56.36 | 11.83 | 59.14 | 8.74  | 58.23 | 7.78 |
| K080 | 65.31 | 7.65  | 61.08 | 9.65  | 58.71 | 6.31 |
| K081 | 54.16 | 11.09 | 57.36 | 5.90  | 54.67 | 4.84 |
| K082 | 61.08 | 8.65  | 55.21 | 8.22  | 52.87 | 7.42 |
| K083 | 61.43 | 7.35  | 61.46 | 9.45  | 58.87 | 8.17 |
| K084 | 67.04 | 9.40  | 53.39 | 8.88  | 55.93 | 8.86 |
| K085 | 51.52 | 9.31  | 49.84 | 9.72  | 54.02 | 3.00 |
| K086 | 50.40 | 5.89  | 54.01 | 4.59  | 50.93 | 6.17 |
| K087 | 56.37 | 6.69  | 59.46 | 8.91  | 57.37 | 4.57 |
| K088 | 50.84 | 10.72 | 55.42 | 7.01  | 59.64 | 6.98 |
| K089 | 66.30 | 9.33  | 56.67 | 6.78  | 59.00 | 8.17 |
| K090 | 67.55 | 6.20  | 54.64 | 4.31  | 49.38 | 4.30 |
| K091 | 68.17 | 9.71  | 59.36 | 8.53  | 56.54 | 5.86 |
| K092 | 58.42 | 8.79  | 59.42 | 7.81  | 56.37 | 5.78 |
| K093 | 58.86 | 9.45  | 57.18 | 6.49  | 58.62 | 7.35 |
| K094 | 56.74 | 11.33 | 59.50 | 6.96  | 58.84 | 7.77 |
| K095 | 55.03 | 12.35 | 56.12 | 7.75  | 54.29 | 7.08 |
| K096 | 58.09 | 5.76  | 61.82 | 5.28  | 57.04 | 7.72 |
| K097 | 60.93 | 6.35  | 55.82 | 3.58  | 56.46 | 6.30 |
| K098 | 49.40 | 4.21  | 60.15 | 9.02  | 57.87 | 7.81 |
| K099 | 47.23 | 5.43  | 54.79 | 3.31  | 58.67 | 4.66 |
| K100 | 60.89 | 8.43  | 53.00 | 4.98  | 50.51 | 5.17 |
| K101 | 67.65 | 10.52 | 59.12 | 7.11  | 50.28 | 3.94 |
| K102 | 54.64 | 4.30  | 51.71 | 7.38  | 60.84 | 8.90 |
| K103 | 56.70 | 6.47  | 58.42 | 6.70  | 57.33 | 6.02 |
| K104 | 53.44 | 4.78  | 64.21 | 7.04  | 57.85 | 5.22 |
| K105 | 59.11 | 7.60  | 49.74 | 11.42 | 53.57 | 6.00 |
| K106 | 62.84 | 8.55  | 52.68 | 6.31  | 53.31 | 4.59 |
| K107 | 57.12 | 6.31  | 63.29 | 5.83  | 62.14 | 5.82 |
| K108 | 63.46 | 14.82 | 65.85 | 8.44  | 63.60 | 7.94 |
| K109 | 56.48 | 3.66  | 62.97 | 10.78 | 60.36 | 8.96 |
| K110 | 59.86 | 9.75  | 54.76 | 9.25  | 57.45 | 7.89 |
| K111 | 53.46 | 3.22  | 55.85 | 6.52  | 50.38 | 3.51 |

|      |       |       |       |       |       |       |
|------|-------|-------|-------|-------|-------|-------|
| K112 | 52.39 | 5.09  | 56.16 | 5.85  | 52.03 | 5.55  |
| K113 | 70.73 | 15.46 | 57.39 | 8.35  | 55.30 | 4.10  |
| K114 | 54.43 | 7.59  | 61.93 | 5.35  | 61.33 | 7.75  |
| K115 | 55.90 | 4.87  | 61.52 | 9.14  | 58.93 | 7.56  |
| K116 | 61.15 | 8.02  | 56.88 | 6.62  | 57.25 | 7.58  |
| K117 | 61.97 | 9.74  | 58.76 | 9.70  | 56.07 | 5.20  |
| K118 | 64.10 | 10.01 | 52.51 | 7.11  | 56.03 | 6.15  |
| K119 | 61.91 | 7.66  | 58.14 | 7.00  | 58.24 | 8.90  |
| K120 | 54.79 | 4.31  | 57.89 | 8.35  | 58.27 | 6.63  |
| K121 | 57.15 | 12.01 | 63.97 | 9.42  | 60.15 | 7.43  |
| K122 | 57.23 | 10.97 | 55.58 | 6.23  | 57.55 | 7.53  |
| K123 | 55.75 | 4.31  | 59.86 | 8.45  | 59.44 | 8.46  |
| K124 | 55.44 | 7.79  | 63.05 | 6.55  | 57.21 | 5.27  |
| K125 | 50.84 | 7.78  | 69.73 | 15.46 | 65.75 | 10.36 |
| K126 | 59.63 | 10.35 | 59.42 | 7.79  | 59.53 | 7.93  |
| K127 | 47.88 | 8.32  | 60.44 | 11.44 | 47.81 | 2.16  |
| K128 | 60.00 | 7.50  | 49.30 | 6.36  | 52.86 | 5.22  |
| K129 | 63.31 | 8.00  | 57.14 | 8.79  | 53.38 | 5.56  |
| K130 | 56.94 | 15.77 | 67.02 | 9.55  | 59.73 | 8.33  |
| K131 | 60.26 | 7.72  | 59.97 | 9.46  | 51.29 | 6.51  |
| K132 | 55.27 | 11.29 | 66.30 | 9.33  | 61.40 | 9.14  |
| K133 | 47.62 | 4.75  | 64.91 | 7.98  | 61.54 | 7.79  |
| K134 | 58.93 | 7.59  | 54.46 | 3.22  | 58.88 | 5.37  |
| K135 | 59.50 | 7.96  | 54.75 | 3.31  | 54.19 | 2.60  |
| K136 | 53.29 | 10.89 | 62.79 | 10.57 | 58.05 | 8.43  |
| K137 | 56.14 | 9.79  | 57.56 | 4.96  | 57.65 | 6.02  |
| K138 | 55.57 | 9.78  | 66.81 | 11.55 | 53.60 | 5.76  |
| K139 | 59.56 | 14.55 | 65.87 | 10.12 | 55.88 | 5.69  |
| K140 | 56.13 | 9.05  | 62.31 | 8.00  | 59.91 | 7.88  |
| K141 | 54.21 | 7.22  | 53.39 | 4.09  | 48.70 | 6.38  |
| K142 | 54.06 | 4.68  | 61.19 | 8.16  | 59.69 | 8.60  |
| K143 | 67.23 | 12.02 | 59.51 | 5.90  | 58.72 | 8.03  |
| K144 | 57.19 | 4.81  | 54.56 | 9.87  | 53.11 | 6.81  |
| K145 | 57.56 | 5.48  | 53.16 | 10.09 | 55.59 | 7.81  |
| K146 | 55.12 | 13.28 | 63.92 | 11.79 | 60.98 | 7.56  |
| K147 | 60.46 | 9.45  | 55.39 | 8.64  | 60.25 | 5.71  |
| K148 | 63.04 | 4.99  | 62.48 | 6.78  | 56.62 | 4.55  |
| K149 | 57.16 | 6.85  | 56.70 | 5.47  | 61.73 | 8.66  |

|      |       |       |       |       |       |      |
|------|-------|-------|-------|-------|-------|------|
| K150 | 59.01 | 8.75  | 58.63 | 9.35  | 58.67 | 4.97 |
| K151 | 46.57 | 3.30  | 60.64 | 6.59  | 58.11 | 5.21 |
| K152 | 70.53 | 5.82  | 55.17 | 9.43  | 51.61 | 3.19 |
| K153 | 58.74 | 7.68  | 63.36 | 4.63  | 64.18 | 4.39 |
| K154 | 66.74 | 7.92  | 61.66 | 6.37  | 56.20 | 4.11 |
| K155 | 56.88 | 5.47  | 63.39 | 7.48  | 60.77 | 7.46 |
| K156 | 55.64 | 4.31  | 54.53 | 5.70  | 51.66 | 4.97 |
| K157 | 54.03 | 8.76  | 56.80 | 6.64  | 54.91 | 3.64 |
| K158 | 69.24 | 9.76  | 52.28 | 7.57  | 51.48 | 8.69 |
| K159 | 56.96 | 6.40  | 64.23 | 10.53 | 56.79 | 6.79 |
| K160 | 62.92 | 12.79 | 56.36 | 11.83 | 55.14 | 6.14 |
| K161 | 56.59 | 3.54  | 52.28 | 4.60  | 49.66 | 4.63 |
| K162 | 57.31 | 3.41  | 63.40 | 10.78 | 57.41 | 7.61 |
| K163 | 49.32 | 4.06  | 64.43 | 8.54  | 58.74 | 8.10 |
| K164 | 58.83 | 4.91  | 59.07 | 6.77  | 54.07 | 5.97 |
| K165 | 53.39 | 7.88  | 54.40 | 9.72  | 51.94 | 8.53 |
| K166 | 58.99 | 7.14  | 60.44 | 6.73  | 60.20 | 7.98 |
| K167 | 55.34 | 7.43  | 61.88 | 5.51  | 64.29 | 8.31 |
| K168 | 54.89 | 11.66 | 67.23 | 11.02 | 57.39 | 5.49 |
| K169 | 56.42 | 6.01  | 53.46 | 10.80 | 49.80 | 7.77 |
| K170 | 59.78 | 9.64  | 60.97 | 10.74 | 57.54 | 4.27 |
| K171 | 57.09 | 10.46 | 67.21 | 9.05  | 58.54 | 7.93 |
| K172 | 56.91 | 8.32  | 64.81 | 10.45 | 59.52 | 7.43 |
| K173 | 63.44 | 7.17  | 53.60 | 8.68  | 52.18 | 8.12 |
| K174 | 63.44 | 10.68 | 52.15 | 4.75  | 53.62 | 4.79 |
| K175 | 52.61 | 9.88  | 58.38 | 4.04  | 54.73 | 4.91 |
| K176 | 50.55 | 1.39  | 53.52 | 7.53  | 51.79 | 6.09 |
| K177 | 52.55 | 5.37  | 54.43 | 8.59  | 53.18 | 8.48 |
| K178 | 50.74 | 11.42 | 54.21 | 4.41  | 55.35 | 5.77 |
| K179 | 63.91 | 6.98  | 59.78 | 8.64  | 58.08 | 8.79 |
| K180 | 57.14 | 8.00  | 56.06 | 6.92  | 56.59 | 7.33 |
| K181 | 48.30 | 6.36  | 58.50 | 8.04  | 56.39 | 5.75 |
| K182 | 60.01 | 4.72  | 62.22 | 5.93  | 59.35 | 6.46 |
| K183 | 53.73 | 10.69 | 64.31 | 8.65  | 55.43 | 6.41 |
| K184 | 62.20 | 6.62  | 54.36 | 5.87  | 52.77 | 5.82 |
| K185 | 59.51 | 6.90  | 60.27 | 8.60  | 57.27 | 7.05 |
| K186 | 64.45 | 10.39 | 66.65 | 9.52  | 52.30 | 4.59 |
| K187 | 56.21 | 5.06  | 63.79 | 7.18  | 55.89 | 5.95 |

|      |       |       |       |       |       |      |
|------|-------|-------|-------|-------|-------|------|
| K188 | 48.84 | 4.19  | 61.91 | 8.66  | 61.48 | 8.33 |
| K189 | 65.03 | 11.20 | 61.34 | 9.73  | 59.10 | 8.45 |
| K190 | 61.74 | 6.35  | 55.06 | 4.68  | 56.94 | 5.89 |
| K191 | 58.31 | 8.95  | 65.03 | 10.20 | 60.61 | 8.06 |
| K192 | 59.48 | 12.40 | 67.17 | 9.71  | 53.36 | 6.96 |
| K193 | 59.36 | 8.53  | 53.61 | 9.88  | 57.17 | 7.84 |
| K194 | 61.02 | 9.71  | 46.88 | 7.32  | 59.63 | 8.61 |
| K195 | 64.05 | 6.55  | 56.37 | 5.69  | 51.70 | 5.15 |
| K196 | 57.18 | 6.49  | 55.74 | 10.33 | 55.52 | 5.44 |
| K197 | 60.52 | 9.14  | 55.90 | 3.87  | 61.43 | 8.54 |
| K198 | 57.06 | 7.92  | 58.01 | 7.75  | 58.20 | 5.85 |
| K199 | 57.16 | 8.92  | 45.57 | 4.30  | 47.74 | 2.84 |
| K200 | 57.12 | 8.75  | 57.82 | 5.05  | 56.62 | 5.29 |
| K201 | 54.28 | 7.80  | 57.09 | 5.76  | 59.54 | 7.20 |
| K202 | 64.40 | 7.64  | 55.34 | 6.43  | 54.17 | 5.47 |
| K203 | 63.79 | 8.18  | 58.13 | 8.52  | 54.83 | 7.58 |
| K204 | 62.36 | 4.63  | 56.48 | 3.66  | 55.00 | 4.01 |
| K205 | 48.89 | 13.54 | 66.71 | 7.58  | 60.40 | 7.48 |
| K206 | 55.80 | 6.64  | 57.83 | 3.91  | 52.94 | 3.92 |
| K207 | 61.87 | 7.64  | 48.30 | 5.64  | 47.12 | 3.47 |
| K208 | 61.52 | 7.95  | 54.88 | 5.26  | 54.23 | 6.16 |
| K209 | 55.39 | 9.64  | 58.37 | 3.53  | 54.51 | 4.50 |
| K210 | 53.46 | 10.80 | 57.74 | 6.68  | 49.42 | 3.54 |
| K211 | 46.07 | 6.83  | 56.88 | 6.47  | 56.08 | 6.16 |
| K212 | 54.56 | 8.87  | 58.31 | 4.41  | 60.39 | 7.59 |
| K213 | 63.39 | 6.48  | 56.68 | 5.96  | 57.14 | 4.55 |
| K214 | 60.66 | 5.37  | 58.59 | 3.97  | 56.52 | 2.90 |
| K215 | 63.09 | 9.37  | 52.13 | 8.21  | 59.21 | 7.59 |
| K216 | 67.71 | 6.58  | 58.98 | 5.84  | 54.70 | 2.85 |
| K217 | 53.13 | 9.21  | 62.43 | 7.35  | 53.53 | 4.04 |
| K218 | 54.60 | 7.68  | 61.81 | 8.63  | 57.11 | 5.41 |
| K219 | 59.08 | 6.48  | 65.59 | 7.44  | 58.72 | 6.82 |
| K220 | 54.59 | 7.53  | 54.96 | 6.84  | 52.45 | 5.39 |
| K221 | 65.27 | 13.06 | 60.36 | 9.59  | 48.68 | 3.92 |
| K222 | 52.29 | 7.42  | 48.55 | 9.23  | 55.02 | 4.74 |
| K223 | 59.69 | 4.05  | 55.80 | 5.47  | 53.20 | 7.01 |
| K224 | 53.07 | 4.70  | 62.34 | 9.91  | 56.81 | 4.73 |
| K225 | 61.19 | 7.16  | 59.26 | 6.72  | 58.22 | 8.67 |

|      |       |       |       |       |       |      |
|------|-------|-------|-------|-------|-------|------|
| K226 | 58.42 | 10.35 | 51.09 | 5.61  | 47.24 | 2.73 |
| K227 | 60.07 | 6.77  | 59.36 | 8.13  | 58.19 | 5.42 |
| K228 | 54.01 | 5.59  | 56.44 | 6.79  | 56.07 | 6.98 |
| K229 | 59.44 | 12.44 | 58.47 | 5.40  | 57.12 | 7.50 |
| K230 | 59.50 | 9.04  | 61.03 | 4.00  | 59.72 | 5.51 |
| K231 | 60.10 | 4.60  | 50.40 | 3.21  | 55.09 | 7.16 |
| K232 | 66.07 | 12.30 | 55.09 | 6.20  | 50.43 | 5.04 |
| K233 | 55.72 | 8.66  | 54.44 | 4.78  | 57.16 | 6.68 |
| K234 | 64.96 | 7.95  | 56.96 | 6.40  | 56.39 | 6.83 |
| K235 | 55.08 | 6.50  | 54.07 | 3.70  | 54.20 | 5.03 |
| K236 | 61.79 | 13.82 | 66.27 | 13.06 | 57.01 | 8.22 |
| K237 | 58.82 | 6.05  | 61.74 | 8.53  | 66.12 | 5.44 |
| K238 | 56.28 | 5.95  | 48.32 | 4.06  | 61.77 | 6.75 |
| K239 | 63.79 | 11.57 | 59.99 | 6.14  | 56.22 | 4.27 |
| K240 | 53.12 | 3.28  | 52.24 | 9.70  | 56.04 | 6.74 |
| K241 | 58.36 | 7.13  | 62.04 | 5.99  | 55.31 | 4.82 |
| K242 | 59.14 | 12.17 | 65.74 | 8.92  | 54.54 | 4.69 |
| K243 | 57.78 | 7.84  | 55.21 | 5.06  | 54.01 | 5.04 |
| K244 | 51.28 | 6.57  | 57.91 | 8.32  | 54.92 | 4.92 |
| K245 | 59.38 | 4.04  | 60.85 | 5.40  | 53.42 | 5.52 |
| K246 | 59.46 | 8.91  | 57.46 | 5.46  | 57.55 | 6.38 |
| K247 | 55.85 | 7.52  | 58.68 | 5.68  | 54.18 | 6.42 |
| K248 | 60.44 | 7.73  | 57.39 | 8.22  | 59.28 | 7.79 |
| K249 | 53.84 | 5.63  | 56.59 | 6.38  | 47.68 | 3.57 |
| K250 | 56.56 | 5.96  | 60.01 | 5.72  | 58.89 | 4.21 |
| K251 | 68.63 | 8.35  | 53.70 | 9.35  | 48.57 | 4.06 |
| K252 | 51.71 | 7.38  | 58.08 | 6.48  | 55.96 | 4.74 |
| K253 | 65.81 | 12.55 | 60.04 | 6.48  | 56.10 | 7.31 |
| K254 | 69.43 | 9.11  | 48.84 | 4.19  | 54.72 | 5.68 |
| K255 | 59.11 | 4.18  | 46.62 | 3.75  | 58.45 | 6.05 |
| K256 | 64.43 | 8.54  | 59.31 | 8.95  | 55.32 | 7.87 |
| K257 | 61.64 | 6.59  | 58.43 | 7.56  | 53.66 | 7.65 |
| K258 | 63.23 | 9.53  | 57.12 | 7.31  | 58.95 | 5.36 |
| K259 | 64.59 | 7.44  | 61.60 | 4.63  | 48.60 | 5.31 |
| K260 | 56.58 | 7.23  | 55.13 | 9.05  | 53.29 | 7.14 |
| K261 | 59.14 | 7.74  | 54.20 | 10.86 | 54.03 | 8.90 |
| K262 | 60.89 | 6.12  | 52.29 | 9.89  | 49.91 | 8.75 |
| K263 | 61.34 | 10.73 | 58.15 | 12.01 | 58.92 | 9.51 |

|      |       |       |       |       |       |       |
|------|-------|-------|-------|-------|-------|-------|
| K264 | 54.00 | 4.98  | 56.94 | 14.77 | 57.17 | 12.28 |
| K265 | 58.42 | 8.81  | 56.73 | 10.27 | 54.75 | 9.19  |
| K266 | 62.88 | 6.51  | 60.41 | 13.34 | 59.49 | 11.11 |
| K267 | 60.04 | 7.64  | 53.89 | 11.66 | 53.91 | 8.84  |
| K268 | 66.04 | 7.86  | 53.73 | 11.69 | 53.91 | 9.36  |
| K269 | 63.48 | 7.78  | 58.38 | 11.95 | 57.74 | 9.97  |
| K270 | 54.78 | 10.45 | 48.89 | 14.54 | 49.81 | 11.06 |
| K271 | 47.30 | 4.64  | 60.14 | 12.17 | 59.00 | 9.43  |
| K272 | 62.97 | 10.42 | 56.12 | 14.28 | 54.24 | 11.52 |
| K273 | 54.70 | 9.35  | 64.45 | 10.39 | 63.60 | 8.71  |
| K274 | 63.97 | 9.78  | 55.57 | 10.78 | 57.23 | 9.77  |
| K275 | 53.20 | 9.86  | 62.46 | 14.82 | 63.61 | 10.10 |
| K276 | 68.02 | 10.55 | 59.56 | 13.55 | 58.72 | 10.92 |
| K277 | 58.42 | 6.70  | 56.12 | 10.77 | 56.01 | 9.09  |
| K278 | 64.51 | 10.79 | 54.48 | 11.54 | 54.47 | 9.27  |
| K279 | 55.68 | 6.96  | 60.41 | 12.27 | 61.28 | 9.85  |
| K280 | 57.76 | 9.70  | 54.96 | 10.81 | 54.91 | 9.48  |
| K281 | 53.60 | 11.55 | 67.64 | 12.73 | 67.98 | 10.01 |
| K282 | 53.52 | 8.53  | 59.88 | 13.67 | 60.57 | 11.37 |
| K283 | 56.17 | 10.43 | 60.48 | 12.40 | 59.60 | 8.93  |
| K284 | 66.15 | 5.64  | 56.09 | 10.46 | 57.56 | 9.47  |
| K285 | 63.81 | 10.45 | 61.79 | 12.82 | 62.33 | 10.73 |
| K286 | 51.29 | 3.31  | 55.27 | 10.29 | 55.00 | 8.71  |
| K287 | 56.13 | 10.72 | 53.60 | 10.55 | 55.09 | 9.11  |
| K288 | 55.67 | 6.78  | 55.47 | 12.30 | 53.81 | 10.39 |
| K289 | 55.21 | 3.41  | 57.95 | 10.51 | 58.57 | 10.01 |
| K290 | 61.83 | 10.43 | 53.95 | 5.23  | 49.33 | 6.38  |
| K291 | 66.30 | 3.08  | 52.58 | 12.68 | 54.68 | 8.91  |
| K292 | 65.30 | 7.70  | 50.84 | 7.78  | 51.98 | 8.44  |

---

Note:C18:2: Linoleic acid C18:3: Linolenic acid.
