# Supplementary material
Source: MDPI journal article supplement (https://www.mdpi.com/2077-0472/13/12/2250)
Supplement: s1 [file s1 › Table S2.pdf]

**Table S2.** This study selected five varieties with high-phenotypic values and five varieties with low-phenotypic values for the two traits as experimental materials.

| Line      | C18:2(%)↑ | C18:3(%) | Line      | C18:2(%) | C18:3(%)↑ |
|-----------|-----------|----------|-----------|----------|-----------|
| K158_High | 69.24     | 9.76     | K042_High | 60.41    | 14.34     |
| K254_High | 69.43     | 9.11     | K139_High | 59.56    | 14.55     |
| K077_High | 69.56     | 10.42    | K108_High | 63.46    | 14.82     |
| K152_High | 70.53     | 5.82     | K113_High | 70.73    | 15.46     |
| K113_High | 70.73     | 15.46    | K130_High | 56.94    | 15.77     |
| K211_Low  | 46.07     | 6.83     | K176_Low  | 50.55    | 1.39      |
| K151_Low  | 46.57     | 3.30     | K064_Low  | 55.82    | 2.58      |
| K099_Low  | 47.23     | 5.43     | K041_Low  | 57.59    | 2.97      |
| K271_Low  | 47.30     | 4.64     | K291_Low  | 66.30    | 3.08      |
| K133_Low  | 47.62     | 4.75     | K111_Low  | 53.46    | 3.22      |

Note:C18:2: Linoleic acid C18:3: Linolenic acid.
