# Supplementary material
Source: MDPI journal article supplement (https://www.mdpi.com/2077-0472/13/12/2250)
Supplement: s1 [file s1 › Table S5.xlsx]

## Sheet: Linoleic acid
source	term_name	term_id	p_value	query_size(Number of target genes)	intersection_size(The number of genes in this category)
GO:MF	gibberellin 20-oxidase activity	GO:0045544	0.000633109	20	1
GO:BP	organic substance metabolic process	GO:0071704	0.000709891	20	5
GO:MF	cation binding	GO:0043169	0.000709891	20	3
GO:MF	metal ion binding	GO:0046872	0.0010557	20	3
GO:MF	transition metal ion binding	GO:0046914	0.0051075	20	1
GO:MF	dioxygenase activity	GO:0051213	0.00156416	20	1
GO:MF	S-(hydroxymethyl)glutathione dehydrogenase activity	GO:0051903	0.00763309	20	2
GO:MF	peptide-lysine-N-acetyltransferase activity	GO:0061733	0.00163309	20	1
GO:MF	peptide N-acetyltransferase activity	GO:0034212	0.074322	20	1
GO:BP	response to chemical	GO:0042221	0.084232	20	2
term_name	term_id	query_size(Number of target genes)	intersection_size(The number of genes in this category)	KEGG_mapping
pentatricopeptide repeat domain-containing protein 1	K17710	20	1	Brite Hierarchies
calcium-binding protein CML	K13448	20	4	Organismal Systems
alcohol dehydrogenase class-P	K18857	20	4	Metabolism
putative homogalacturonan methyltransferase	K23872	20	3	putative homogalacturonan methyltransferase
RNA polymerase II C-terminal domain phosphatase-like 1/2	K18998	20	1	Brite Hierarchies
gibberellin-44 dioxygenase	K05282	20	1	Metabolism
deoxyguanosine kinase	K00904	20	2	Metabolism
phosphatidylinositol-3,4,5-trisphosphate 3-phosphatase and dual-specificity protein phosphatase PTEN	K01110	20	1	Metabolism
sedoheptulose-bisphosphatase	K01100	20	2	Metabolism
pto-interacting protein 1	K13436	20	1	Organismal Systems

## Sheet: Linolenic acid
source	term_name	term_id	p_value	query_size(Number of target genes)	intersection_size(The number of genes in this category)
GO:BP	lipid metabolic process	GO:0006629	0.000633109	27	1
GO:MF	oxidoreductase activity	GO:0016491	0.000709891	27	3
GO:MF	DNA-3-methylguanine glycosylase activity	GO:0052822	0.000809891	27	2
GO:MF	kinase activity	GO:0016301	0.0010557	27	1
GO:MF	histamine N-methyltransferase activity	GO:0046539	0.0011075	27	5
GO:MF	DNA-7-methylguanine glycosylase activity	GO:0043916	0.00156416	27	3
GO:MF	transition metal ion transmembrane transporter activity	GO:0046915	0.00163309	27	2
GO:MF	ATPase regulator activity	GO:0060590	0.00163309	27	3
GO:MF	molecular transducer activity	GO:0060089	0.178287	27	1
GO:MF	transcription regulator activity	GO:0140110	0.285065	27	2
GO:MF	protein-folding chaperone binding	GO:0051087	0.320625	27	3
GO:CC	Derlin-1 retrotranslocation complex	GO:0036513	0.639945	27	1
term_name	term_id	query_size(Number of target genes)	intersection_size(The number of genes in this category)	KEGG_mapping
omega-6 fatty acid desaturase / acyl-lipid omega-6 desaturase	K10256	27	1	Lipid metabolism
DNA polymerase delta subunit 2	K02328	27	3	Genetic Information Processing
pyruvate dehydrogenase phosphatase	K01102	27	5	Brite Hierarchies
actin, other eukaryote	K10355	27	2	Cellular Processes
DnaJ homolog subfamily B member 13	K09519	27	3	Brite Hierarchies
ADP-ribose/FAD diphosphatase	K18453	27	1	Metabolism
riboflavin kinase	K00861	27	1	Metabolism
glutathione S-transferase	K00799	27	3	Metabolism
peroxidase	K00430	27	2	Metabolism
E3 ubiquitin-protein ligase RNF5	K10666	27	1	Genetic Information Processing
homeobox-leucine zipper protein	K09338	27	2	Brite Hierarchies
thioredoxin 1	K03671	27	3	Organismal Systems
