# Supplementary material
Source: MDPI journal article supplement (https://www.mdpi.com/2077-0472/13/12/2250)
Supplement: s1 [file s1 › Table S6.pdf]

**Table S6.** Information on candidate genes related to linoleic and linolenic acid content in soybean.

| Trait          | Gene ID                | Chr  | Start    | End      | Allel | SNP position | Pvalue   | Function annotation                                                                                                                                                                                                                                               |
|----------------|------------------------|------|----------|----------|-------|--------------|----------|-------------------------------------------------------------------------------------------------------------------------------------------------------------------------------------------------------------------------------------------------------------------|
| linoleic       | <i>Glyma.13G035600</i> | Gm13 | 10063434 | 10067331 | C/A   | 10009679     | 7.02E-04 | Biological Process: gibberellin biosynthetic process (GO:0009686);;<br>Biological Process: unidimensional cell growth (GO:0009826);;<br>Biological Process: flower development (GO:0009908);;<br>Molecular Function: gibberellin 20-oxidase activity (GO:0045544) |
| linolenic acid | <i>Glyma.19G147400</i> | Gm19 | 41268263 | 41270535 | T/C   | 41366844     | 6.81E-04 | Biological Process: lipid metabolic process (GO:0006629);;<br>Molecular Function: oxidoreductase activity, acting on paired donors, with oxidation of a pair of donors resulting in the reduction of molecular oxygen to two molecules of water (GO:0016717)      |

Note: p-value measures the degree of association between a SNP and a trait
